# Supplementary material for: The efficacy of vitamin C, thiamine, and corticosteroid therapy in adult sepsis patients: a systematic review and meta-analysis
Source: PubMed Central journal article supplement — Acute Crit Care. 2021 Jun 30;36(3):185–200. doi: 10.4266/acc.2021.00108 (PMC8435446; doi:10.4266/acc.2021.00108), 2021-06-30
Supplement: acc-2021-00108-suppl2.pdf [file acc-2021-00108-suppl2.pdf]

**Supplementary Table 2.** Risk of bias assessment of RCTs

| Study                 | Randomization process | Deviation from intended intervention | Missing outcome data | Measurement of outcome | Selection of reported results | Overall risk of bias |
|-----------------------|-----------------------|--------------------------------------|----------------------|------------------------|-------------------------------|----------------------|
| Fujii (2020) [42]     | Low                   | Some concerns                        | Low                  | Low                    | Low                           | Some concerns        |
| Karimpour (2020) [43] | Low                   | Low                                  | Low                  | Low                    | Some concerns                 | Some concerns        |
| Wani (2020) [44]      | Some concern          | Low                                  | Low                  | Low                    | Some concerns                 | Some concerns        |
| Iglesias (2020) [46]  | Low                   | Low                                  | Low                  | Low                    | Low                           | Low                  |
| Moskowitz (2020) [47] | Low                   | Low                                  | Low                  | Low                    | Low                           | Low                  |
| Mohamed (2020) [49]   | Low                   | Some concerns                        | Low                  | Low                    | Low                           | Some concerns        |
| Chang (2020) [51]     | Low                   | Some concerns                        | Low                  | Low                    | Low                           | Some concerns        |
| Sevransky (2021)[52]  | Low                   | Low                                  | Low                  | Low                    | Low                           | Low                  |

RCT: randomized controlled trial.
