# Supplementary material for: The efficacy of vitamin C, thiamine, and corticosteroid therapy in adult sepsis patients: a systematic review and meta-analysis
Source: PubMed Central journal article supplement — Acute Crit Care. 2021 Jun 30;36(3):185–200. doi: 10.4266/acc.2021.00108 (PMC8435446; doi:10.4266/acc.2021.00108), 2021-06-30
Supplement: acc-2021-00108-suppl3.pdf [file acc-2021-00108-suppl3.pdf]

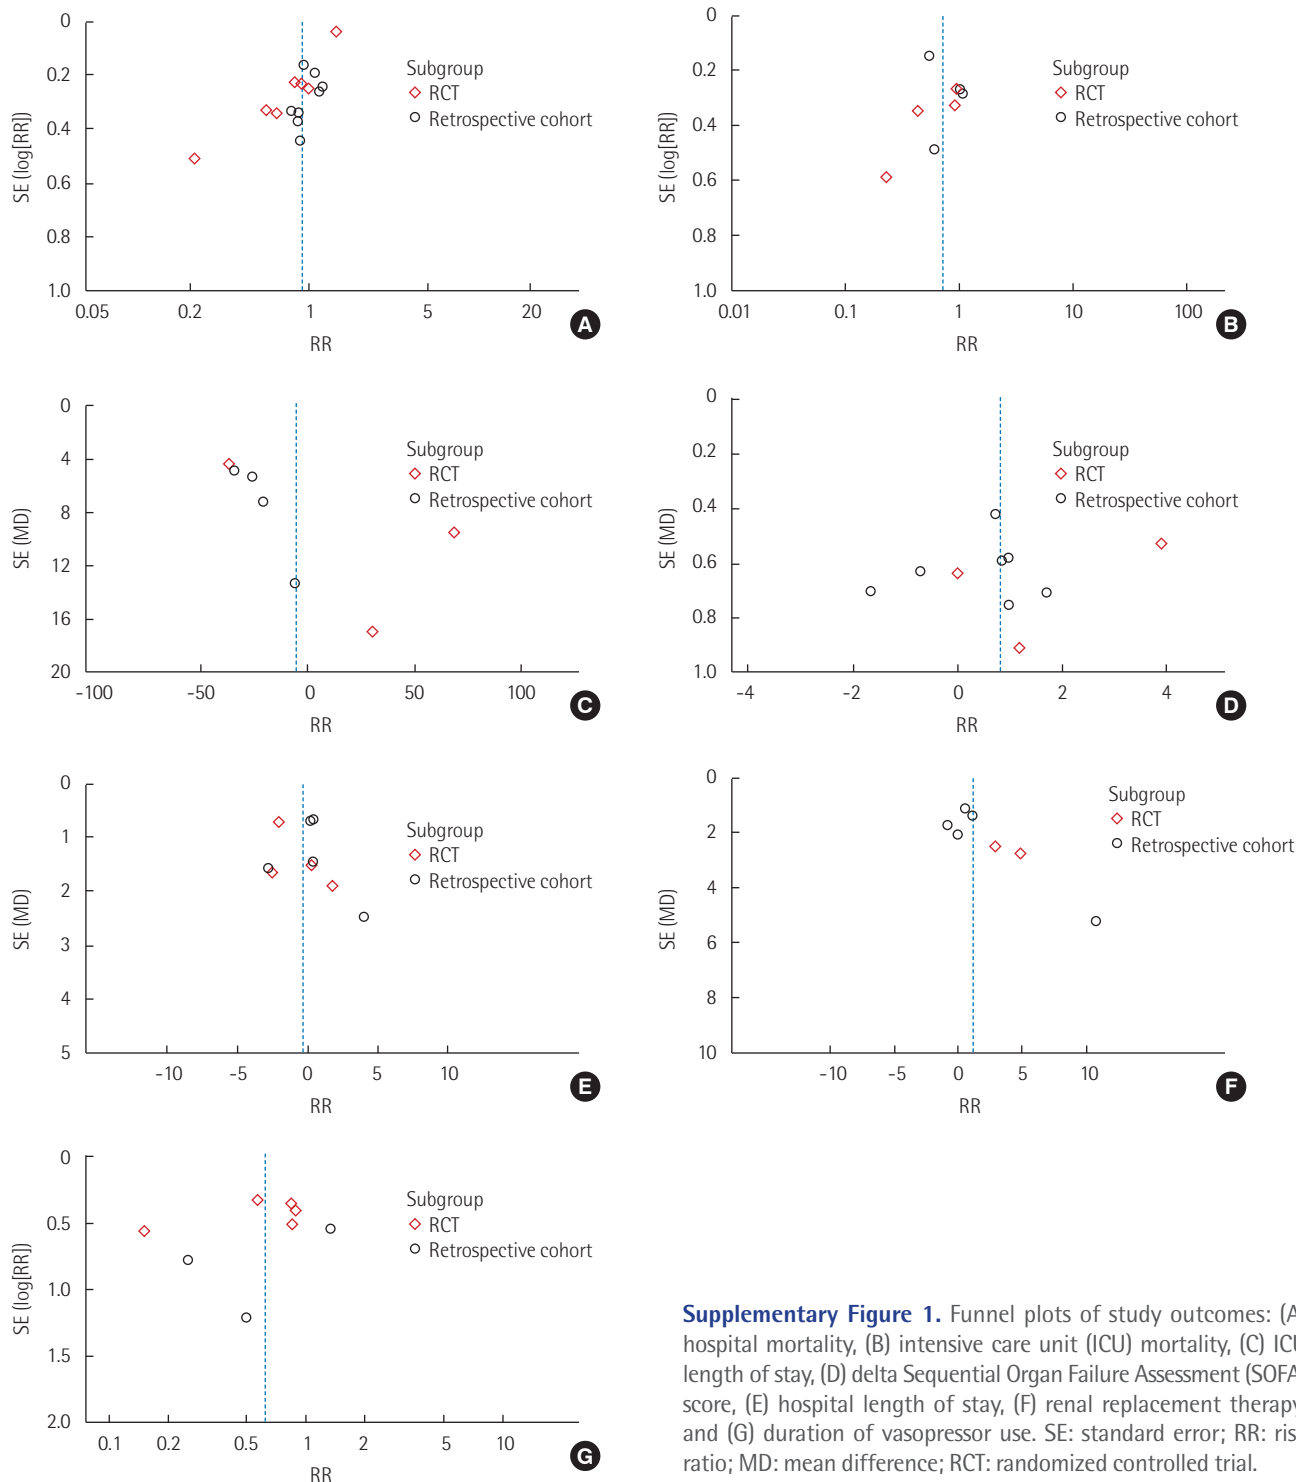

**Supplementary Figure 1.** Funnel plots of study outcomes: (A) hospital mortality, (B) intensive care unit (ICU) mortality, (C) ICU length of stay, (D) delta Sequential Organ Failure Assessment (SOFA) score, (E) hospital length of stay, (F) renal replacement therapy, and (G) duration of vasopressor use. SE: standard error; RR: risk ratio; MD: mean difference; RCT: randomized controlled trial.
