# Supplementary material for: The efficacy of vitamin C, thiamine, and corticosteroid therapy in adult sepsis patients: a systematic review and meta-analysis
Source: PubMed Central journal article supplement — Acute Crit Care. 2021 Jun 30;36(3):185–200. doi: 10.4266/acc.2021.00108 (PMC8435446; doi:10.4266/acc.2021.00108), 2021-06-30
Supplement: acc-2021-00108-suppl4.pdf [file acc-2021-00108-suppl4.pdf]

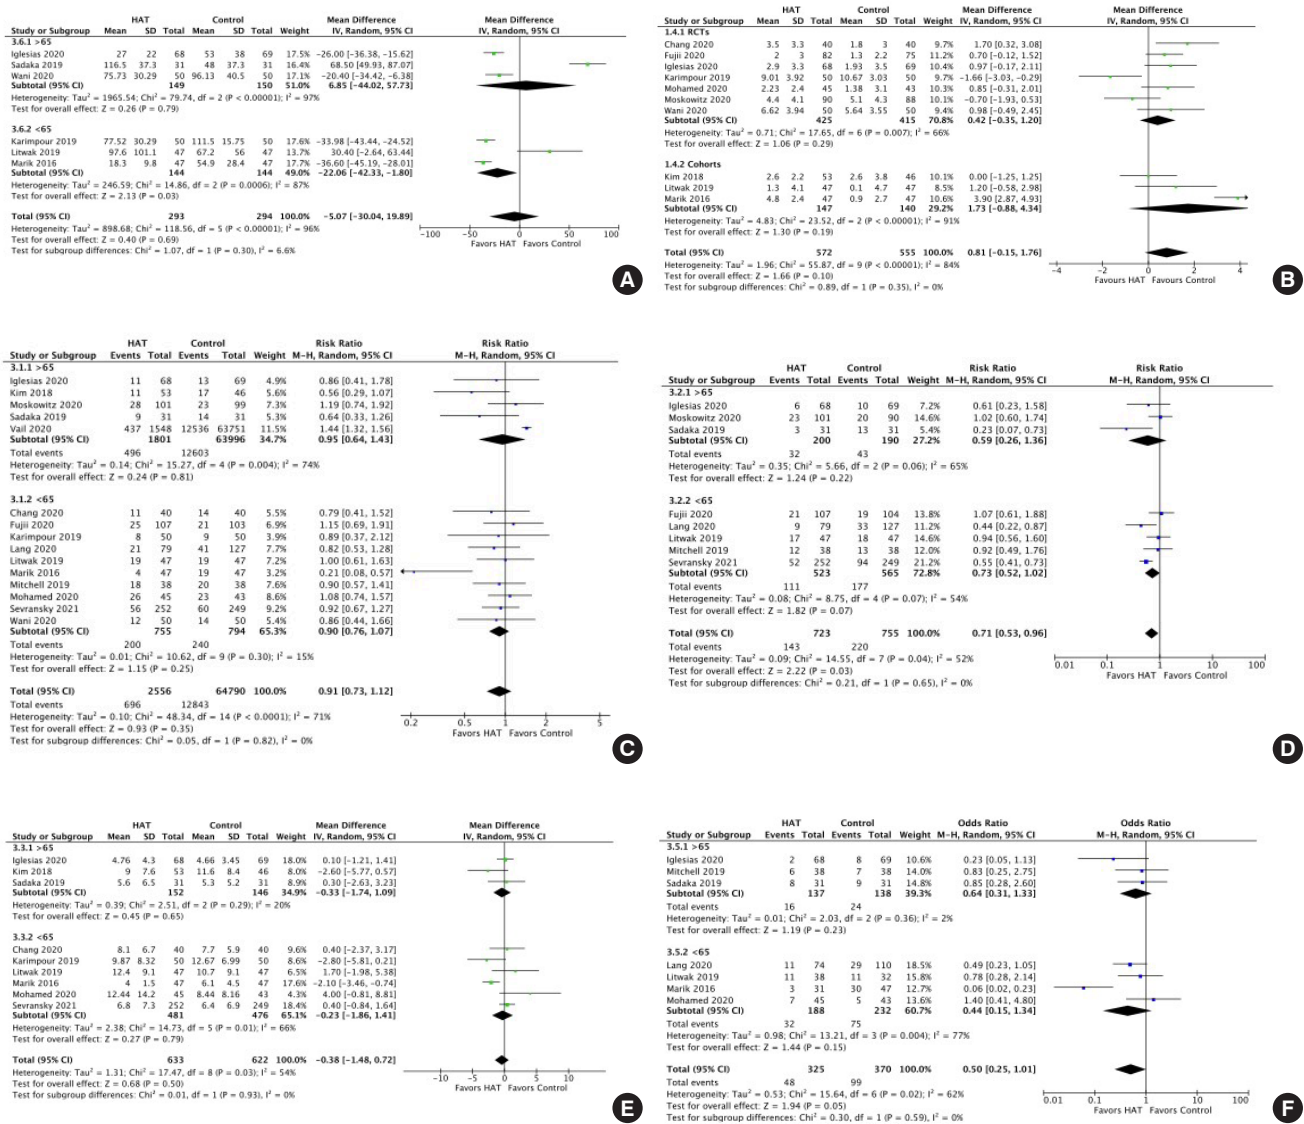

**Supplementary Figure 2.** Forest plots of subgroup analysis based on age for the study outcomes: (A) duration of vasopressor use, (B) delta Sequential Organ Failure Assessment (SOFA) score, (C) hospital mortality, (D) intensive care unit (ICU) mortality, (E) ICU length of stay, and (F) renal replacement therapy. HAT: hydrocortisone, ascorbic acid (vitamin C), and thiamine; SD: standard deviation; IV: weighted mean difference; CI: confidence interval; df: degrees of freedom.
